# Supplementary material for: Tunable piezoresistivity of low percolation threshold micro-nickel wires/PDMS conductive composite regulated by magnetic field
Source: Royal Society of Chemistry journal article supplement (doi:10.1039/d1tc00530h), 2021-01-01
Supplement: d1tc00530h1.pdf [file d1tc00530h1.pdf]

# Supporting Information

## **Tunable Piezoresistivity of Low Percolation Threshold Micro-Nickel Wires/PDMS Conductive Composite Regulated by Magnetic Field**

Shaoyu Niu<sup>†</sup>, Shan Wang<sup>†</sup>, Qilong Yan<sup>†</sup>, Zheyi Han<sup>†</sup>, Xiang Lou<sup>†</sup>, Qiyang Li<sup>⊥</sup>,

Zongrong Wang\*, Chi Wah Leung <sup>\*§</sup>, Shaoxing Qu<sup>\*⊥</sup>

<sup>†</sup> State Key Lab of Silicon Materials, School of Materials Science and Engineering,  
Zhejiang University, Hangzhou, 310027, China

<sup>§</sup> Department of Applied Physics, The Hong Kong Polytechnic University, Hung  
Hom, Hong Kong, China

<sup>⊥</sup> State Key Laboratory of Fluid Power & Mechatronic System, Key Laboratory of  
Soft Machines and Smart Devices of Zhejiang Province, Center for X-Mechanics, and  
Department of Engineering Mechanics, Zhejiang University, Hangzhou, 310027,  
China

\*Corresponding author

E-mail: zrw@zju.edu.cn, squ@zju.edu.cn, [apleung@polyu.edu.hk](mailto:apleung@polyu.edu.hk)

## 1. The electrodes used during the assembly and package of the sensor

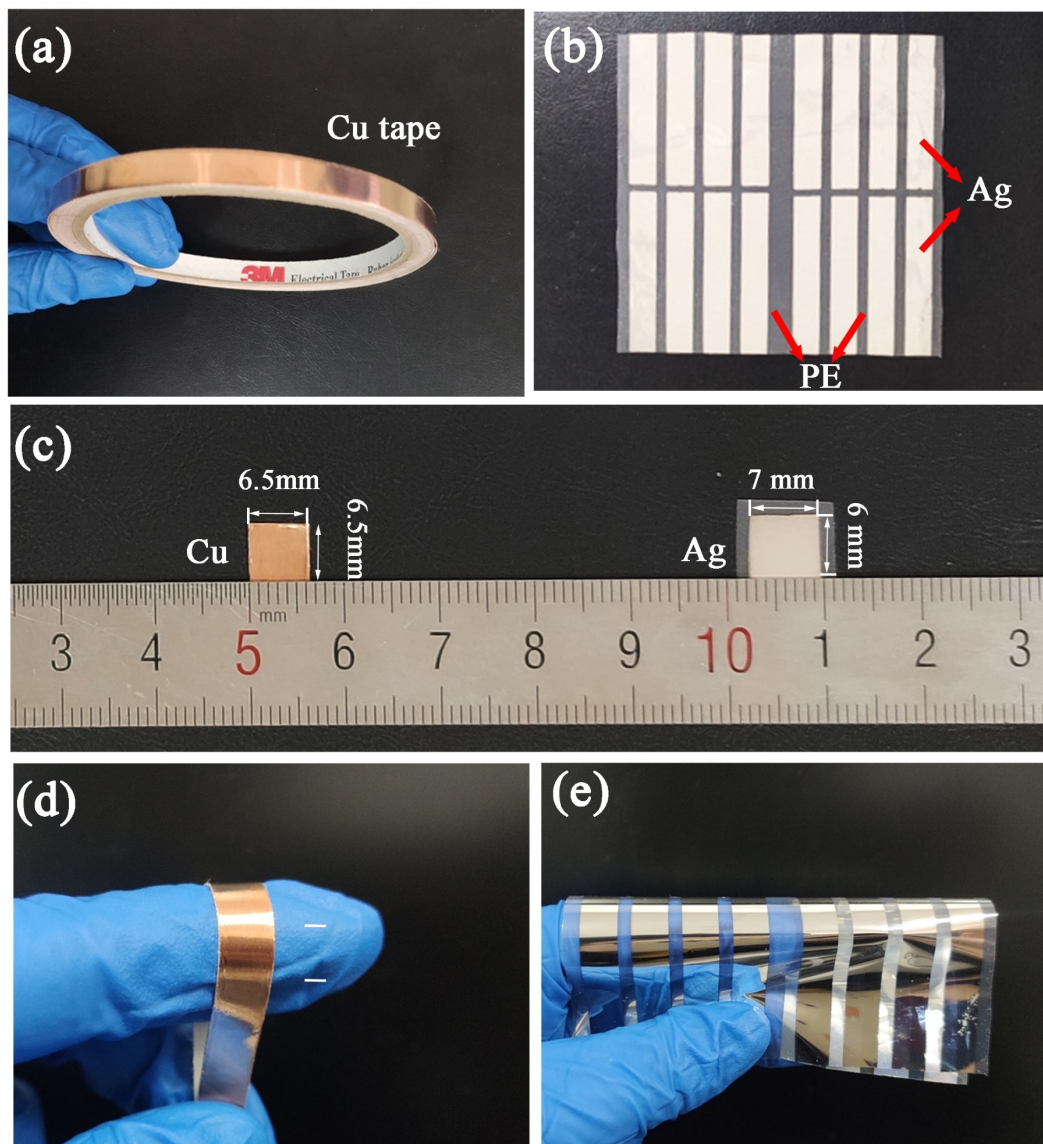

**Fig. S1.** Photographs of (a) conductive Cu tape and (b) Ag electrodes deposited on PE film. (c) Dimensions of Cu electrode and Ag electrode. (d) Photograph of Cu electrodes under bending conditions. (e) Photograph of Ag electrodes deposited on PE substrate under bending conditions.

## 2. The packaging steps of the sensor used for the demonstration

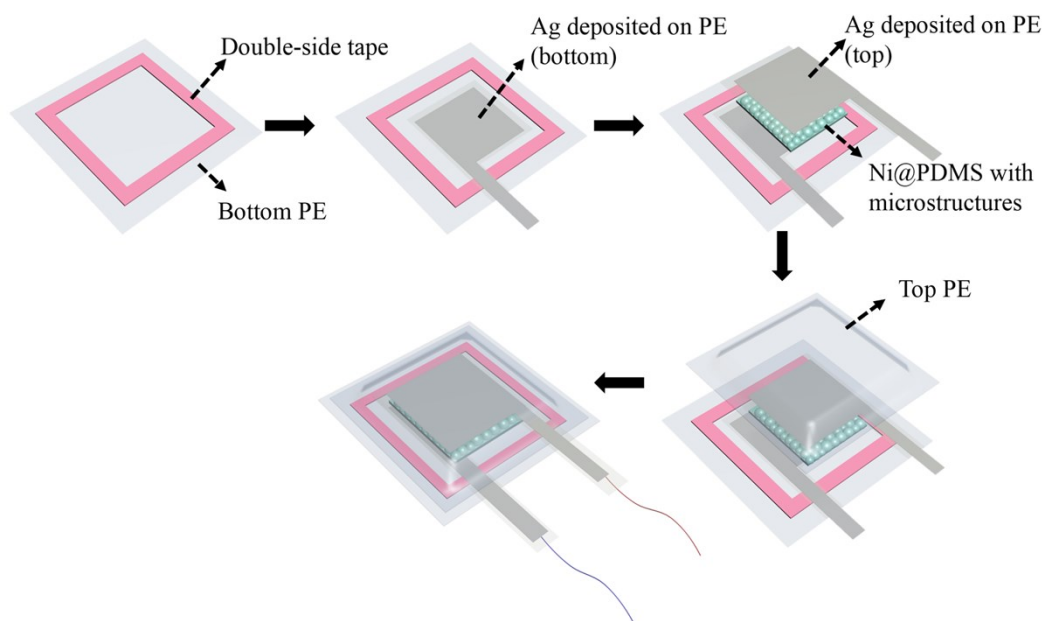

**Fig. S2.** Schematic diagram of encapsulation steps of the piezoresistive sensor based on Ni@PDMS composite with microhump structures.

## 3. The exhibition of flexibility of the packaged sensor

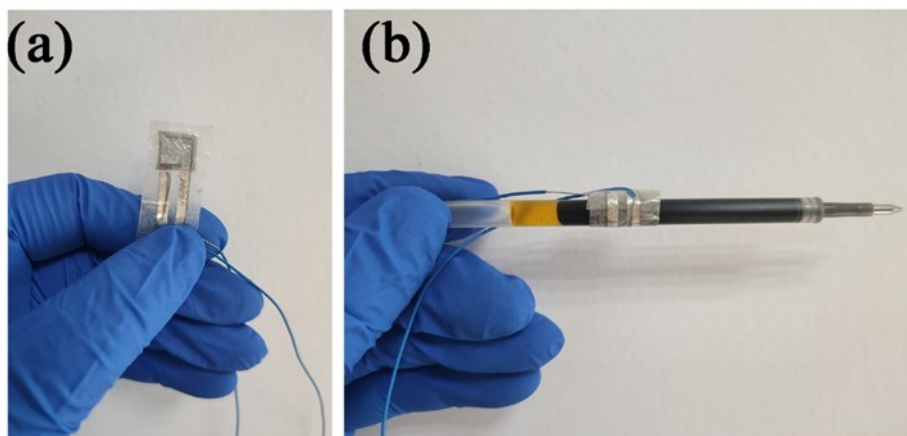

**Fig. S3.** (a) Photograph of a packaged piezoresistive pressure sensor based on Ni@PDMS composite with microhump structures. (b) The sensor could be completely rolled onto a cartridge.
